# Supplementary material for: A National Virtual Research Training Workshop for 3800 Medical Students: A Mixed-Methods Evaluation of A Novel Research Education Program
Source: Research Square preprint supplement (doi:10.21203/rs.3.rs-384338/v1), 2021-04-14
Supplement: Supplementary file 1 [file 06dd1d93259df5cdeabdce0a.docx]

**INTERVIEW GUIDE FOR FOCUSED GROUP DISCUSSIONS (FGDs)**

**Section 1: Participant Expectations**

1. What was your inspiration in applying for the course?

A. Do you feel learning about research and its skills would allow you to excel in your choice of career?

B. Do you want to pursue a career in research?

C. Do you think this workshop was useful for your CV and/or college applications?

D. Did you want to spend your time at home doing something productive?

E. Do you think the provision of E-certificates served as a motivator to attend the workshop series?

2. According to you, were the expected objectives and content covered within the course? Please give reasoning for your answer.

**Section 2: Course Organization**

1. What do you think were the strengths of the course?

2. What do you think were the limitations of the course?

3. What do you think were the possible challenges for the participants in registering and attending the Workshop? For example;

- Internet connectivity or device issues

- Online university/high-school classes that clashed with the dates/times of the sessions

4. Do you have any suggestions which can help us in further improving the organization of the course?

**Section 3: Impact Assessment**

1. How did your baseline knowledge change through the course? Has it improved/remained the same?

2. Which session did you learn the most from and why?

3. What features of the course allowed you to expand your learning?

4. What features of the course hindered you from accessing complete knowledge of the course? E.g. technological aspects, interaction limit, knowledge beyond your comprehension capability etc.

5. What are the key points that you remember from the course?

After this series, do you feel well equipped with your research skills to be able to:

- Work on a research project yourself

- Teach the topics and skills from the workshop to other aspiring researchers from within your institutes

- Conduct similar workshops within your home institutes

Would you be interested in another series covering advanced information of these sessions? If yes, what are the topics that you would like to be covered further in those sessions.
