# Supplementary material for: A National Virtual Research Training Workshop for 3800 Medical Students: A Mixed-Methods Evaluation of A Novel Research Education Program
Source: Research Square preprint supplement (doi:10.21203/rs.3.rs-384338/v1), 2021-04-14
Supplement: Supplementary file 2 [file f5e4fda208cafca154970aa7.docx]

**QUANTITATIVE FEEDBACK SURVEY**

SECTIONS AND SUB-SECTIONS OF THE SURVEY FORM

Section 1: Objectives and Course Content

On a scale of 1-5 (1= strongly disagree, 2= disagree, 3= neutral, 4= agree, 5= strongly agree), please evaluate the following aspects of the course for each section:

**1              2                3                4                   5**

The course delivered the objectives that I expected before joining:

The content of the course was presented as per the level of my understanding:

The course helped improve my overall knowledge on the basics of research:

Section 2: Delivery of the Course

On a scale of 1-5 (1= strongly disagree, 2= disagree, 3= neutral, 4= agree, 5= strongly agree), please evaluate the following aspects of the course for each section:

**1              2                3                4                   5**

The speakers held expertise over their subject matter:

The speakers were efficient and clear in their content delivery:

The questions were adequately answered by the speakers:

The delivery style was easy to understand and made sense:

Section 3: Logistics of the Series

On a scale of 1-5 (1= strongly disagree, 2= disagree, 3= neutral, 4= agree, 5= strongly agree), please evaluate the following aspects of the course for each section:

**1              2                3                4                   5**

The duration of each workshop was enough to cover all the objectives:

The duration of the entire series was enough to cover all the objectives:

The pace/speed of the course was suitable to understanding the content efficiently:

The course made it possible for participants to ask questions through the moderators:

The technical logistics were planned out properly for the course duration:

Section 4: Strengths and Limitations of the Series

Which of the following areas was the strongest feature of this series (select ONE)?

A. Course Content

B. Course Duration

C. Course Delivery Method and Approach

D. Course Accessibility and Outreach

E. Course Video and Sound Quality

F. Course Organization and Management

G. None

Other:

Which of the following was the area that needed the most improvement (select ONE)?

A. Course Content

B. Course Duration

C. Course Delivery Method and Approach

D. Course Accessibility and Outreach

E. Course Video and Sound Quality

F. Course Organization and Management

G. None

Other:

Section 5: Overall Comments on the Series

On a scale of 1-5 (1= strongly disagree, 2= disagree, 3= neutral, 4= agree, 5= strongly agree), please evaluate the following aspects of the course for each section:

**1              2                3                4                   5**

I will recommend a similar workshop to my friends and colleagues in the future:

I made the correct decision to sign up for the BASIC research series:

I am interested in participating in a future ADVANCED research series:

I am confident that the skills gained from this workshop will help me take part in a research project

How would you rate this course overall?

- Outstanding
- Excellent
- Very Good
- Good
- Fair
- Satisfactory
- Unsatisfactory
- Poor
